# Supplementary material for: Vitamin B12: chemical modifications
Source: Royal Society of Chemistry journal article supplement (doi:10.1039/c3cs60062a), 2013-01-01
Supplement: c3cs60062a.pdf [file c3cs60062a.pdf]

## Supporting Information

### Table of Content

|                                                      | <b>Page</b> |
|------------------------------------------------------|-------------|
| Links to Thesis's                                    | 2           |
| Mass Spectrometry                                    | 3           |
| - (CN)Cbl MALDI, ESI                                 | 4           |
| - (CN) <sub>2</sub> Cby(OMe) <sub>7</sub> MALDI, ESI | 5           |
| Elemental Analysis                                   | 6           |
| References                                           | 6           |

## 1. Links to Thesis's.

Munk, W. Ph. D. Thesis, *ETH Zürich*, 1994.

[http://www.library.ethz.ch/search/action/display.do?tabs=detailsTab&ct=display&fn=search&doc=ebi01\\_prod000971816&indx=1&recIds=ebi01\\_prod000971816&recIdxs=0&elementId=0&renderMode=poppedOut&displayMode=full&frbrVersion=&dscnt=0&fctN=facet\\_domain&frbg=&fctV=ETH+E-Collection&tab=default\\_tab&dstmp=1365510595010&srt=rank&mode=Basic&dum=true&fromLogin=true&backFromPreferences=true&v1%28freeText0%29=munk&cmslang=eng-GB&vid=DADS&prefLang=en\\_US](http://www.library.ethz.ch/search/action/display.do?tabs=detailsTab&ct=display&fn=search&doc=ebi01_prod000971816&indx=1&recIds=ebi01_prod000971816&recIdxs=0&elementId=0&renderMode=poppedOut&displayMode=full&frbrVersion=&dscnt=0&fctN=facet_domain&frbg=&fctV=ETH+E-Collection&tab=default_tab&dstmp=1365510595010&srt=rank&mode=Basic&dum=true&fromLogin=true&backFromPreferences=true&v1%28freeText0%29=munk&cmslang=eng-GB&vid=DADS&prefLang=en_US)

Kreppelt, F. Ph. D. Thesis, *ETH Zürich*, 1991.

[http://www.library.ethz.ch/search/action/display.do?tabs=detailsTab&ct=display&fn=search&doc=ebi01\\_prod000626280&indx=2&recIds=ebi01\\_prod000626280&recIdxs=1&elementId=1&renderMode=poppedOut&displayMode=full&frbrVersion=&dscnt=1&v1%28134576197UI0%29=any&scp.scps=scope%3A%28ebi01\\_prod%29%2Cscope%3A%28EPICS%29%2Cscope%3A%28replay%29%2Cscope%3A%28retroseals%29%2Cscope%3A%28cmistar%29%2Cscope%3A%28%22ARCHIVDATENBANK%22%29&frbg=&tab=default\\_tab&dstmp=1365510643298&srt=rank&mode=Basic&dum=true&tb=t&v1%281UIStartWith0%29=contains&v1%28291561170UI1%29=all\\_items&v1%28freeText0%29=Kreppelt&vid=DADS](http://www.library.ethz.ch/search/action/display.do?tabs=detailsTab&ct=display&fn=search&doc=ebi01_prod000626280&indx=2&recIds=ebi01_prod000626280&recIdxs=1&elementId=1&renderMode=poppedOut&displayMode=full&frbrVersion=&dscnt=1&v1%28134576197UI0%29=any&scp.scps=scope%3A%28ebi01_prod%29%2Cscope%3A%28EPICS%29%2Cscope%3A%28replay%29%2Cscope%3A%28retroseals%29%2Cscope%3A%28cmistar%29%2Cscope%3A%28%22ARCHIVDATENBANK%22%29&frbg=&tab=default_tab&dstmp=1365510643298&srt=rank&mode=Basic&dum=true&tb=t&v1%281UIStartWith0%29=contains&v1%28291561170UI1%29=all_items&v1%28freeText0%29=Kreppelt&vid=DADS)

Caderas, C. Ph. D. Thesis, *ETH Zürich*, 1985.

[http://www.library.ethz.ch/search/action/display.do?tabs=detailsTab&ct=display&fn=search&doc=ebi01\\_prod000346933&indx=1&recIds=ebi01\\_prod000346933&recIdxs=0&elementId=0&renderMode=poppedOut&displayMode=full&frbrVersion=&fctN=facet\\_domain&dscnt=0&v1%28134576197UI0%29=any&scp.scps=scope%3A%28ebi01\\_prod%29%2Cscope%3A%28EPICS%29%2Cscope%3A%28replay%29%2Cscope%3A%28retroseals%29%2Cscope%3A%28cmistar%29%2Cscope%3A%28%22ARCHIVDATENBANK%22%29&fctV=ETH+E-Collection&frbg=&tab=default\\_tab&dstmp=1365510683678&srt=rank&mode=Basic&dum=true&tb=t&v1%281UIStartWith0%29=contains&v1%28291561170UI1%29=all\\_items&v1%28freeText0%29=Caderas&vid=DADS](http://www.library.ethz.ch/search/action/display.do?tabs=detailsTab&ct=display&fn=search&doc=ebi01_prod000346933&indx=1&recIds=ebi01_prod000346933&recIdxs=0&elementId=0&renderMode=poppedOut&displayMode=full&frbrVersion=&fctN=facet_domain&dscnt=0&v1%28134576197UI0%29=any&scp.scps=scope%3A%28ebi01_prod%29%2Cscope%3A%28EPICS%29%2Cscope%3A%28replay%29%2Cscope%3A%28retroseals%29%2Cscope%3A%28cmistar%29%2Cscope%3A%28%22ARCHIVDATENBANK%22%29&fctV=ETH+E-Collection&frbg=&tab=default_tab&dstmp=1365510683678&srt=rank&mode=Basic&dum=true&tb=t&v1%281UIStartWith0%29=contains&v1%28291561170UI1%29=all_items&v1%28freeText0%29=Caderas&vid=DADS)

**2. Mass Spectrometry:** In our experience, ESI is the most suitable ionization technique for mass spectrometry experiments for most of the vitamin B<sub>12</sub> derivatives, in which mono-charged signals for [M-CN]<sup>+</sup> or [M+Na]<sup>+</sup> cations are usually obtained.<sup>1</sup> However, due to the size of the compound MALDI is also commonly used. Examples of MS spectra for (CN)Cbl and (CN)<sub>2</sub>Cby(OMe)<sub>7</sub> are shown below.

### (CN)Cbl MALDI

Matrix:  $\alpha$ -cyano-4-hydroxycinnamic acid

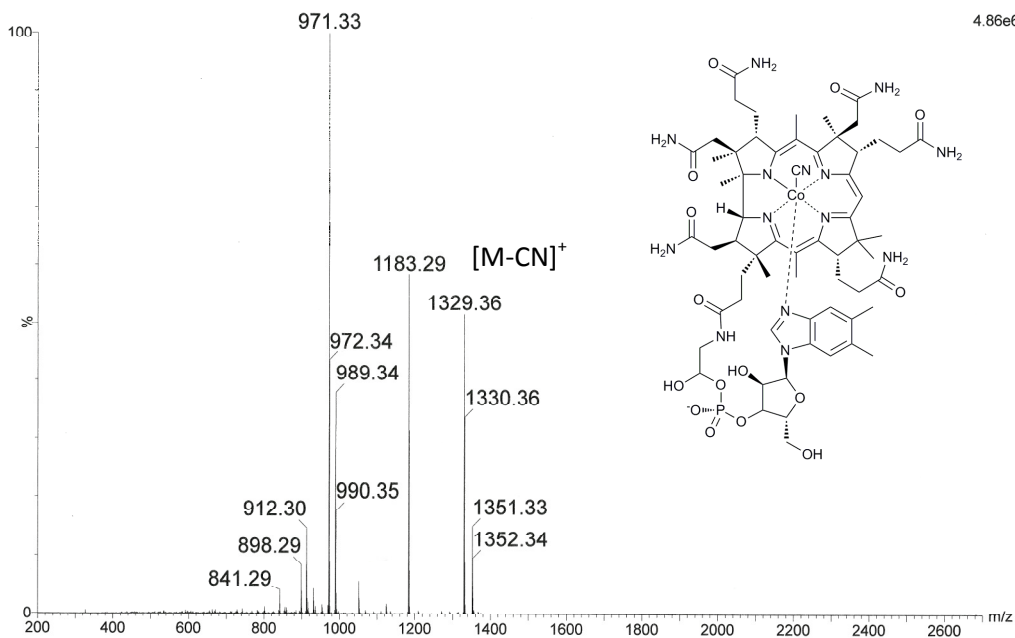

### (CN)Cbl ESI

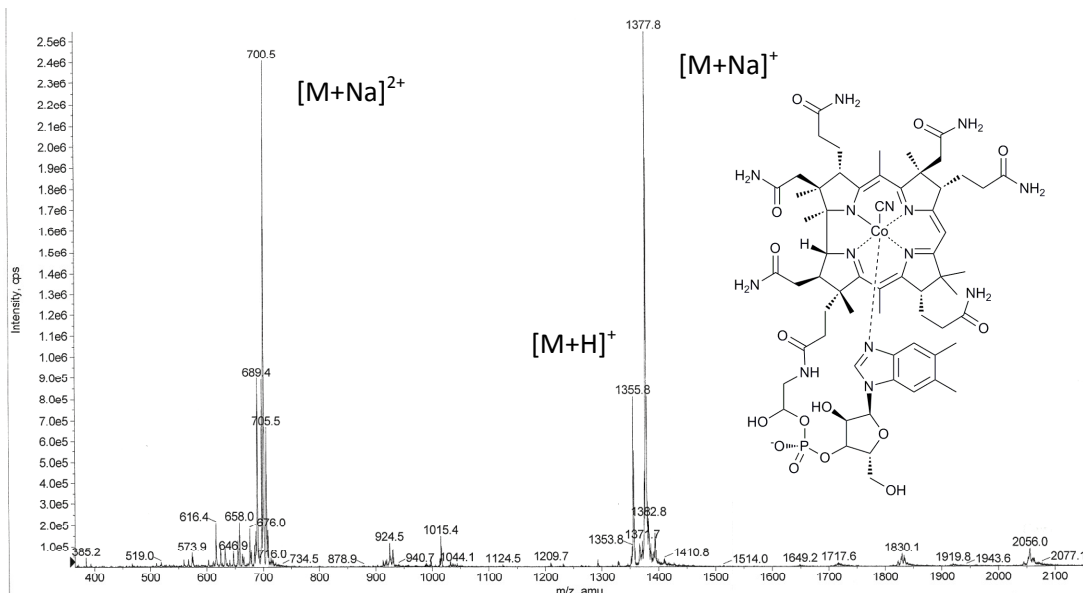

### (CN)<sub>2</sub>Cby(OMe)<sub>7</sub> MALDI

Matrix:  $\alpha$ -cyano-4-hydroxycinnamic acid

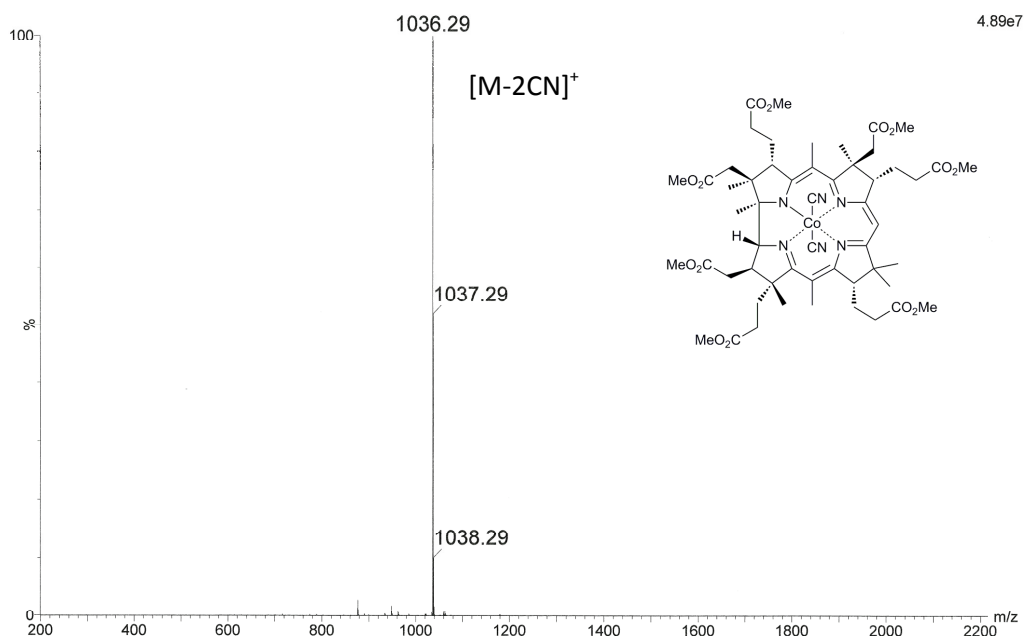

### (CN)<sub>2</sub>Cby(OMe)<sub>7</sub> ESI

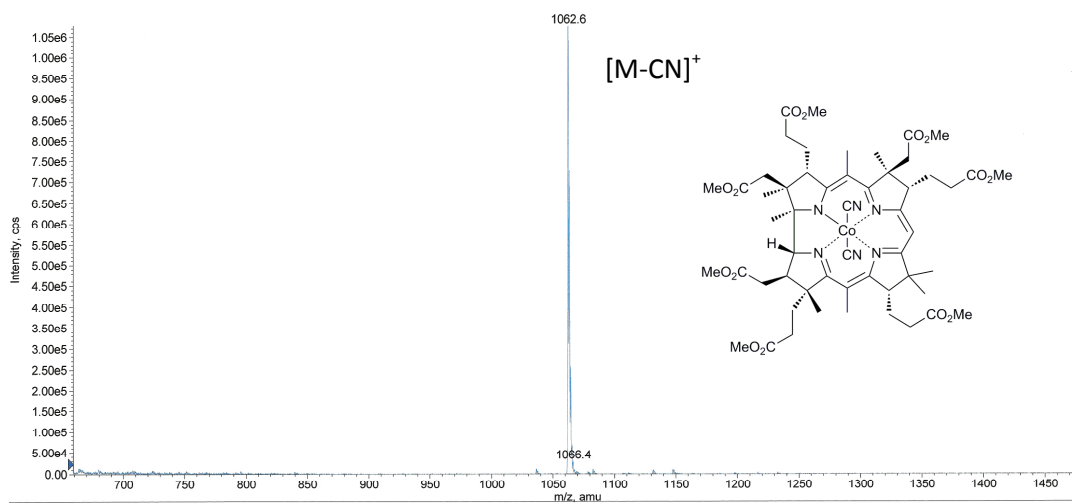

### 3. Elemental Analysis

It is common for many analogues to coordinate water molecules, which must be included in the calculated values for elemental analysis.

### 4. References

---

<sup>i</sup> Świder, P. Ph. D. Thesis, *Institute of Organic Chemistry PAS*, 2012.
